# History-dependent perturbation response in limb muscle

Thomas Libby<sup>1</sup>, Chidinma Chukwueke<sup>2</sup>, and Simon Sponberg<sup>3</sup>

<sup>1</sup>Department of Electrical Engineering, University of Washington, Seattle, WA 98195, USA

<sup>2</sup>Wallace H. Coulter Department of Biomedical Engineering and

<sup>3</sup>School of Physics and School of Biological Sciences, Georgia Institute of Technology,  
Atlanta, GA 30332

Keywords: Muscle, Workloop, Perturbation, Running, Cockroach, Viscoelastic

Running title: Perturbed workloops

Summary Statement: The response of muscles to rapid, identical strain perturbations is history dependent, but is captured by a viscoelastic model with memory. Muscle function during perturbations therefore depends on locomotor frequency.

## 12 1 Abstract

13 Muscle mediates movement but movement is typically unsteady and perturbed. Muscle is known  
14 to behave non-linearly and with history dependent properties during steady locomotion, but the  
15 importance of history dependence in mediating muscles function during perturbations remains less  
16 clear. To explore muscle's capacity to mitigate perturbations, we constructed a series of perturba-  
17 tions that varied only in kinematic history, keeping instantaneous position, velocity and time from  
18 stimulation constant. We discovered that muscle's perturbation response is profoundly history de-  
19 pendent, varying by four fold as baseline frequency changes, and dissipating energy equivalent to  
20  $\sim 6$  times the kinetic energy of all the limbs (nearly  $2400 \text{ W Kg}^{-1}$ ). Muscle's energy dissipation  
21 during a perturbation is predicted primarily by the force at the onset of the perturbation. This  
22 relationship holds across different frequencies and timings of stimulation. This history dependence  
23 behaves like a viscoelastic memory producing perturbation responses that vary with the frequency  
24 of the underlying movement.

## 25 2 Introduction

26 Muscle produces, dissipates, stores, returns, and transits mechanical energy to adopt diverse func-  
27 tions during locomotion (Dickinson et al., 2000). Even the same muscle can adopt different functions  
28 in unsteady or perturbed conditions (Biewener and Daley, 2007; Azizi and Roberts, 2010). A sin-  
29 gle muscle in the leg of cockroach normally dissipates energy during steady-state running (Ahn  
30 et al., 2006; Full et al., 1998). Yet when the animal is perturbed, neural feedback can categorically  
31 switch the muscle's function from one stride to the next (Sponberg, Spence, Mullens and Full,  
32 2011). Under unsteady conditions the muscle can dissipate more than ten times the energy that it  
33 does in steady state or convert its function to that of non-linear motor (Sponberg, Libby, Mullens  
34 and Full, 2011). It remains challenging to predict function from the quasi-static length-tension  
35 and force-velocity relationships, especially under unsteady conditions. Nonetheless such conditions  
36 likely pose greater performance demands than steady-state.

37 Strain history-dependent muscle properties are well known to affect muscle's stress develop-  
38 ment. These properties include force depression during shortening and force enhancement during  
39 lengthening. While the specific mechanisms for history dependence remain controversial and are  
40 likely multifaceted (Rassier, 2012), there are established consequences for steady, transition, and  
41 impulsive behaviors (Josephson, 1999; Roberts and Azizi, 2011; Herzog et al., 2015; Nishikawa,  
42 2016). However, muscle function during perturbations during movement is much less explored.  
43 Perturbations around steady-state, typically tetanic conditions are ubiquitous and simple material  
44 models like a viscoelastic Voigt body or a three component Hill model can typically capture muscle  
45 behavior in these cases (*e.g.* (Kirsch et al., 1994; Zajac, 1989; Cannon and Zahalak, 1982). However,  
46 dynamic conditions can create unexpected shifts in muscle performance (Robertson and Sawicki,  
47 2015). During running, muscle experiences large rapid perturbations against a background strain  
48 trajectory where history has the potential to alter function. This modulation could have profound  
49 effects on muscle's response to unsteady perturbations encountered during running, including slips  
50 or impacts with the substrate. Does history significantly modulate work output during rapid per-  
51 turbations to periodic trajectories and can we reconcile any non-linearity with the simple material  
52 models that capture perturbations in static conditions?

53 To test these ideas we construct a systematic perturbation to a cockroach limb muscle that can  
54 reveal the importance of history on transient behavior and identify simple predictors of function  
55 (Fig. 1a). To do this we maintain the same Hill-model contractile properties (stimulation, strain  
56 trajectory, and velocity), while changing the strain history leading up to a perturbation. We  
57 modify this history by changing the frequency of background strain. We hypothesize that history  
58 dependence modulates muscle's mechanical response to rapid perturbations, but that the response

59 will be predictable from the components of an active viscoelastic system. If history dependence has  
60 a functionally relevant consequence for rapid mechanical perturbations then muscle work during  
61 the perturbation should vary systematically with history. If this history dependence matters for  
62 locomotion then the modulation produced should be significant in light of the mechanical power  
63 required to alter limb movement.

### 64 3 Materials and methods

65 Cockroaches (*Blaberus discoidalis*) were housed on a 12:12 light-dark cycle and fed dog chow *ad*  
66 *libitum*. We targeted the ventral femoral extensor of the middle leg (muscle 137), which is not the  
67 extensor that primarily powers limb extension, but rather a control muscle implicated in pertur-  
68 bation responses to locomotion on rough terrain (Full et al., 1998; Ahn and Full, 2002; Sponberg  
69 and Full, 2008). Instead of isolated muscle work loops (Josephson, 1985), we used intact joint work  
70 loops following previous methods (Fig. 1b, (Sponberg, Libby, Mullens and Full, 2011)). In brief,  
71 all motor neurons innervating the middle leg are severed at the mesothoracic ganglion by surgical  
72 ablation of Nerves 3, 4, 5, and 6. The limb is then mounted on a custom restraint stage and the  
73 coxa immobilized with epoxy. A muscle ergometer (Aurora Scientific 305C) attaches to the femur  
74 near the coxa femur joint via a two pin joint that allows for rotation. The femur and more distal  
75 segments are removed and the target muscle is activated via implant bipolar silver wire electrodes.  
76 The moment arm, pivot point, and linear relationship between joint angle and muscle strain are  
77 taken from prior work on this muscle. During steady-state work loop and imposed perturbations,  
78 the ergometer prescribed joint trajectories and simultaneously measured force. While this precludes  
79 the muscle from dynamically interacting with a load perturbation, it enabled us to use comparable  
80 conditions that vary only in history.

81 Besides the advantage of preserving the animals nutrient and oxygen supply to the target  
82 muscle, the intact joint work loop allows us to estimate the total passive work done on the joint.  
83 Here, muscle work loops are the active component of the work, calculated by measuring a passive  
84 work loop under identical strain conditions (including the perturbation) and subtracting the force  
85 measured in the passive trial from that of the active trial. The remaining force signal can be  
86 converted to muscle force (through the lever arm ratios) or used to calculate muscle work. Prior  
87 work (Sponberg, Libby, Mullens and Full, 2011) validated this approach as reflective of the work  
88 output and muscle function reported in more traditional partially isolated, muscle work loops with  
89 direct neural stimulation (Full et al., 1998; Ahn et al., 2006).

90 Steady-state work loop conditions reflected strain trajectory from *in vivo* 10 Hz running con-  
91 ditions and included three muscle potentials (spikes) of stimulation at 10 ms interspike interval  
92 and 0.5 ms duration applied at the onset of shortening. Stimulus voltage for each preparation was  
93 tuned to the minimum voltage needed to elicit a plateaued twitch response plus one volt. Per-  
94 turbations were imposed halfway through shortening (stance) phases. We constructed 10 ms (100  
95 Hz) half-sine perturbations of amplitude equal to the stride amplitude. These strain perturbations  
96 were not summed with background periodic strain but rather pasted in place, so that kinematics  
97 were exactly identical across all history conditions (Fig. 1a). The initial and terminal 1 ms of  
98 the perturbation was smoothed into the underlying strain trajectory using a linear ramp filter to  
99 prevent discontinuities in velocity.

100 We modified kinematics and timing of stimulus to test the effect of history on perturbation re-  
101 sponse. Perturbation kinematics remained constant in all conditions. To preserve Hill determinants  
102 during the perturbation, we varied the phase of stimulation so that the spike train always began  
103 20 ms before the onset of perturbation (hence the stimulation in these altered conditions did not  
104 reflect natural timing). We changed the phase of the background work loop so that perturbations  
105 occurred both mid-stance and mid-swing, and we varied cycle frequency from 1 to 13.5 Hz, which  
106 was the fastest condition where we could maintain accurate perturbation conditions. To test the

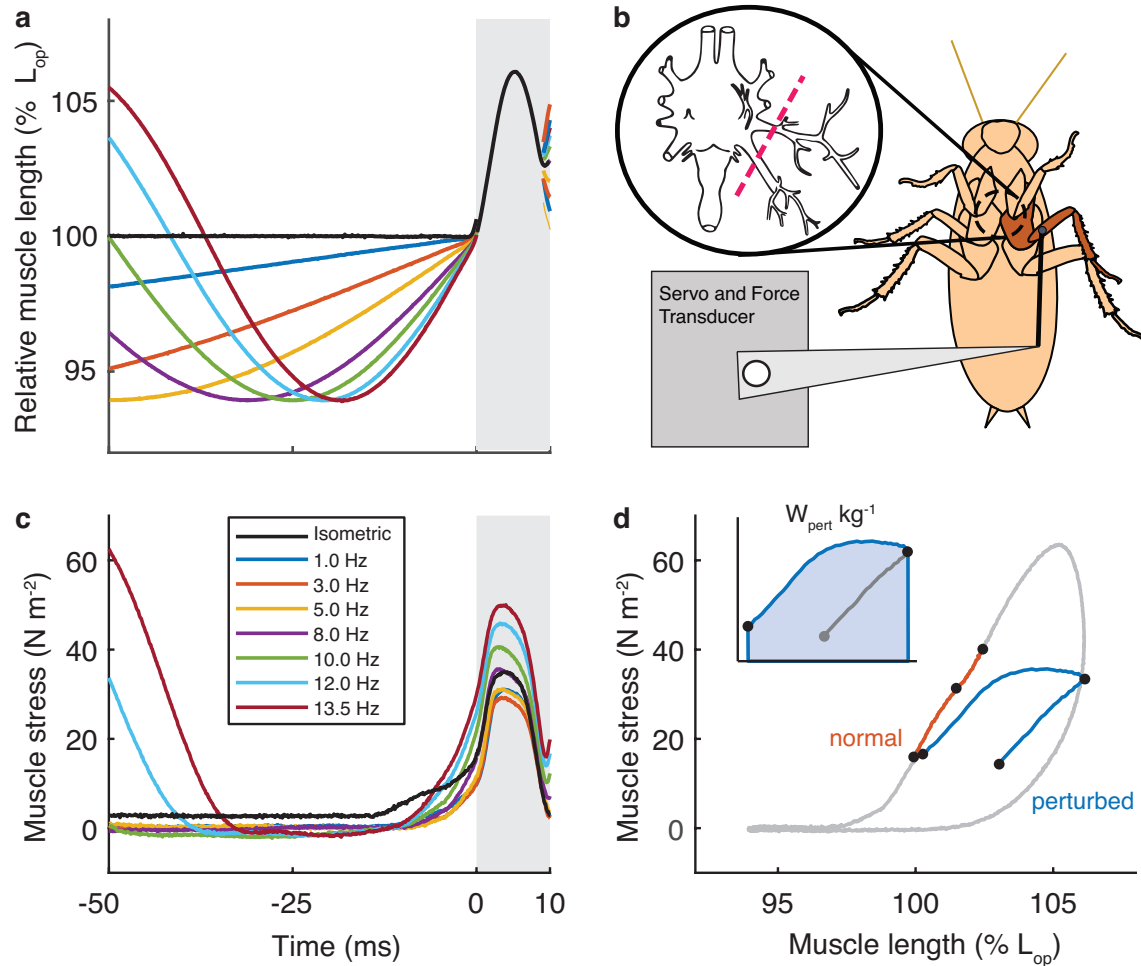

Figure 1: Identical eccentric perturbations (grey region) were applied during sinusoidal strain cycles of 1 Hz to 13.5 Hz (a). The intact joint workloop preparation (b) extracellularly stimulates muscles in the deinnervated limb (inset shows ganglion nerves cut adapted from (Pipa and Cook, 1959)). After subtracting out the passive joint work throughout the cycle (Sponberg, Libby, Mullens and Full, 2011), muscle stress (c) was integrated over strain for the eccentric portion of the perturbation to calculate work,  $W_{pert}$  (d).

107 generality of our results, we repeated these conditions at different stimulation timings varying from  
 108 10 to 40 ms.

## 109 4 Results and discussion

### 110 4.1 Muscle's perturbation response is history-dependent

111 Muscles absorbed energy during all perturbations (Fig. 1c). We characterized the muscle's re-  
 112 sponses by the mechanical energy dissipated during the stretch portion of the perturbation (the  
 113 area under the force-length curve (Fig. 1d). Muscles absorbed  $23.6 \pm 4.6 \text{ Jkg}^{-1}$  during pertur-  
 114 bations applied against a 10 Hz pre-lengthened background. A Hill-type contractile unit would  
 115 respond with identical force profiles to the perturbation regardless of kinematic history. By con-  
 116 trast, we found that active muscle stress and energy dissipation increased strongly as we increased  
 117 frequency under pre-lengthened conditions, and decreased with frequency under pre-shortened con-

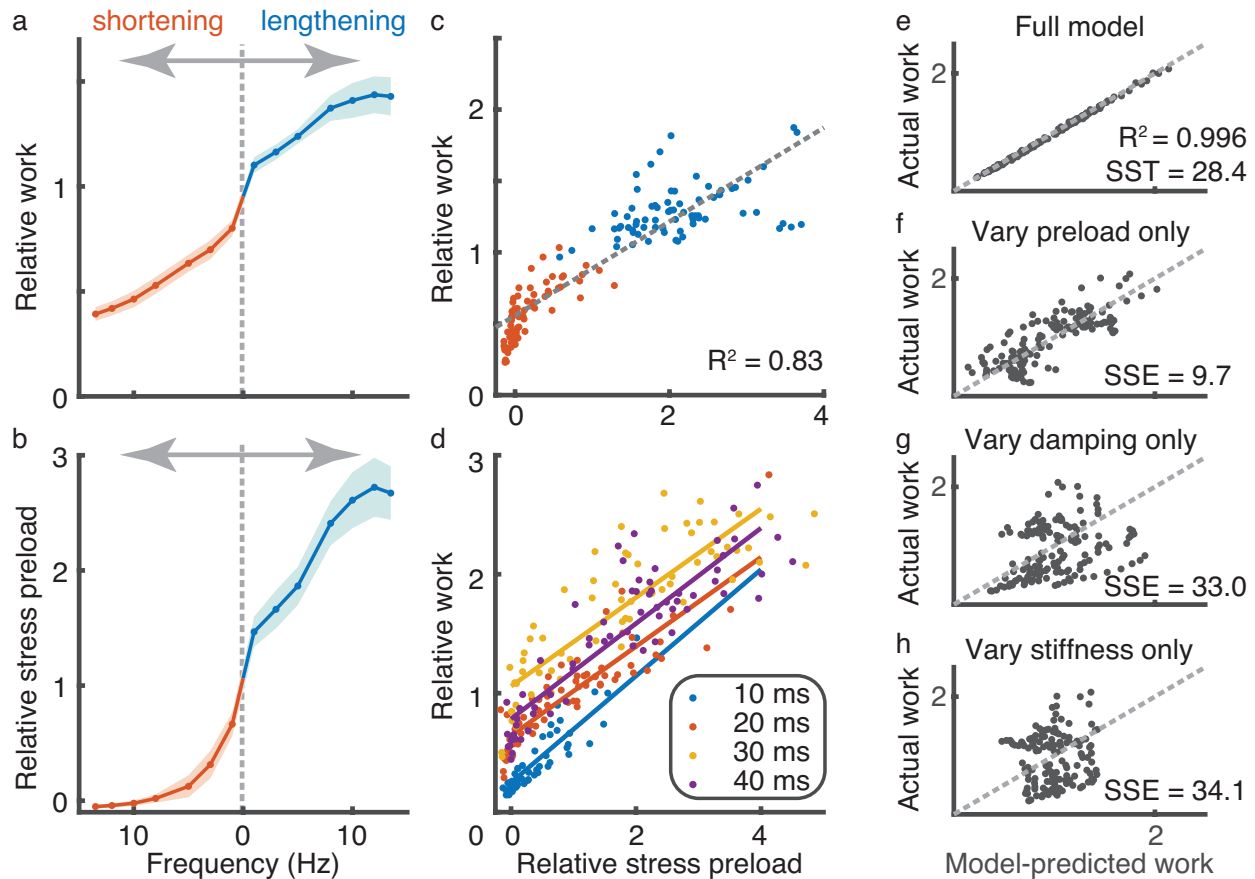

Figure 2: Work during perturbation (a) and preload stress (b) both vary significantly and monotonically with frequency, resulting in a correlated response (c). This relationship persists if stimulation varies by changing how long before the perturbation the muscle is electrically stimulated (d). To normalize across animals, work is taken relative to the average of the two 1 Hz perturbation conditions which most closely approximate the isometric work response. Relative stress is scaled to the isometric response to *in vivo* stimulation conditions (3 spikes, 10 ms interspike interval). Preload refers to stress developed immediately prior to the onset of the perturbation. A 3-parameter viscoelastic model with memory (e) predicts muscle's work during the perturbation (Fig. 1d). While all three parameters contribute to the full model, preload (f) has a predictive effect on its own, unlike damping (g) and stiffness (h). A sum of square errors (SSE) greater than the total sum of squares (SST) indicates a non-predictive model (g & h).

118 ditions (Fig. 2a). Energy absorption varied almost 4-fold over the range of frequencies we tested.  
119 At the typical running stride frequency of 10 Hz, dissipation almost tripled if the muscle was  
120 perturbed in identical ways during shortening and lengthening.

## 121 4.2 Force at onset of perturbation determines work

122 If preloading is the primary determinant of the muscle's variable perturbation response, then the  
123 force at the onset of the perturbation should parallel the change in dissipative work. Indeed, muscle  
124 stress prior to perturbation onset showed a pattern of frequency dependence similar to work (Fig.  
125 2b) and the two are highly correlated (Fig. 2c,  $R^2 = 0.83$ ,  $p < 10^{-6}$ ). Despite the sharp deviations  
126 from an otherwise monotonic work relationship on pre-stretch at 15 Hz, the stress at onset of these  
127 perturbations still recapitulated the changes in absorption. At the fastest shortening velocities (left  
128 side of Fig. 2 a,c), work continues to fall off even after preload stress has reached zero likely because  
129 of the need to take up slack from the transition of rapid shortening to lengthening.

130 To further test the robustness of this relationship, we repeated the frequency and phase exper-  
131 iments while varying the timing of muscle stimulation prior to perturbation. Muscle stress prior  
132 to perturbation near static conditions increased almost 10 fold as timing advanced from 10 *ms* to  
133 40 *ms*, but both the frequency dependency and the correlation between stress and work persisted  
134 across stimulation conditions (Fig. 2d,  $R > 0.85$ ,  $p < 10^{-6}$  for all timings).

135 A Hill-type contractile element model fails to predict muscle's perturbation response, even  
136 when time scales are quite rapid. Instead we support the hypothesis that history dependence tunes  
137 muscle's mechanical response to perturbations. Muscle's response to rapid stretches is known to  
138 have viscoelastic properties (Kirsch et al., 1994; Zajac, 1989); here we show that the context in  
139 which a perturbation occurs, meaning the muscle's force history, modulates these properties and  
140 shapes muscle's function even on short time scales. While Hill-like contractile elements fail to  
141 directly predict the functional modulation during the perturbation, they do play a role because the  
142 pre-perturbation forces follows a classic force-velocity curve (Fig. 2b), velocity is proportional to  
143 frequency). Despite history varying muscle's mechanical work (Fig. 2a), the behavior of muscle is  
144 nonetheless predictable. This relationship holds regardless of whether the muscle is pre-shortened  
145 or pre-lengthened and across a range of frequencies and stimulation spanning natural running (Fig.  
146 2c, d).

## 147 4.3 A viscoelastic model with memory captures muscle's rapid perturbation 148 response

149 Since muscle force-length behavior during the perturbations appeared viscoelastic (Fig. 1d), we  
150 fit a parallel spring-damper (Voigt) model with a variable preload offset to the perturbation data.  
151 Changes in dissipative work against history could arise from I) a change in stiffness, II) increased  
152 viscous damping, or III) a change in the preload force. The full model fit these parameters separately  
153 for each condition (phase and frequency) and strongly predicted observed energy absorption (Fig.  
154 2e,  $R^2 > 0.99$ ). To examine which parameters were most predictive, we tested three models  
155 which each allowed only one parameter to vary (with the other two set to the average across  
156 all frequencies/phases). Doing so reduced the variance accounted for in all cases, but only when  
157 preload varied did the model retain any predictive ability (Fig. 2f-h).

158 The model property that best explained the functional variation was preload, rather than stiff-  
159 ness or damping. In prior studies with small sinusoid perturbation, muscle stiffness varied with  
160 frequency (Cannon and Zahalak, 1982; Kirsch et al., 1994). Here, variable stiffness does not account  
161 for the major differences in perturbation work, likely because total strain, velocity and prior stim-  
162 ulation were kept the same. During perturbations to steady state conditions, work also varies with  
163 pre-perturbation force (Kirsch et al., 1994). We show that this adjustment, equivalent to changing  
164 the set point of a viscoelastic model, is the critical feature for dynamic conditions and can account



165 for differences in perturbations responses relevant to locomotion. Our results are consistent with  
166 a viscoelastic memory effect, which typically arises from stored energy in elastic structures that  
167 cannot relax instantaneously.

168 What are the potential mechanisms for this non-linearity? Series elastic elements (SSEs) can  
169 modulate the state of the muscle fibers, contributing to energy storage and return, power ampli-  
170 fication, or dissipation (Roberts and Azizi, 2011). Yet SSE's role in rapid perturbations is less  
171 explored. Our results might be explained by a contractile element with a series elastic component.  
172 However, the viscoelastic properties of insect apodeme and the exoskeletal attachment are typically  
173 an order of magnitude stiffer than vertebrate tendon (Bennet-Clark, 1975; Zajac, 1989). They are  
174 also short and would require  $\sim 60\%$  strain to account for the perturbation if the muscle remained  
175 isometric. It is likely that the muscle must be significantly involved in modulating the preloading  
176 and hence the work done during the perturbation. Other contributors to series elasticity could also  
177 play a role.

178 Nonuniformity in sarcomere strain and force production (Rassier and Herzog, 2004) is a likely  
179 contributor to history dependence, but it is unlikely to be the only explanation because history  
180 dependence typically manifests in single sarcomeres (Leonard et al., 2010; Rassier, 2012). There is  
181 also growing appreciation that components of the muscle lattice other than actin and myosin might  
182 contribute to history dependent phenomena (Rassier, 2012; Herzog et al., 2015; Nishikawa, 2016).  
183 Titin and other large structural proteins have been implicated in history dependent properties in  
184 muscle. Calcium-dependent binding of the N2A domain effectively changes the stiffness and offset  
185 of the spring-like PEVK domain (Herzog et al., 2015). Titin also is suggested to have a further role  
186 in force generation via active winding of titin around the thin filaments (Nishikawa, 2016; Lindstedt  
187 and Nishikawa, 2017). Other components might play a role as well, especially regulatory elements  
188 that are strain-dependent like tropomyosin (Tanner et al., 2012; Holt and Williams, 2018).

#### 189 **4.4 Muscle's mechanical behavior during perturbations is significant for loco-** 190 **motion**

191 Regardless of mechanism, the history-dependent modulation of work during a perturbation would  
192 only have meaningful consequences for locomotion if the overall change is significant in the context  
193 of muscle, joint, limb, and body. Surprisingly this capacity is substantial at all scales even in a  
194 relatively small muscle (Table 1). The energy absorbed by the muscle during the perturbation we  
195 applied is at least comparable to the kinetic energy of all the limbs (Kram et al., 1997) and at most  
196 could absorb the center of mass kinetic energy of a 3 g animal running at 20 cm/s! Despite being  
197 about  $1/10^{th}$  the mass of the animal's largest femoral extensor, muscle 137 absorbed more energy  
198 during a single perturbation at 10 Hz than the larger muscle produces during running (Ahn and  
199 Full, 2002). Muscle 137 absorbed about threefold more energy than the entire joint did during the  
200 same perturbation.

201 This single cockroach muscle therefore serves as an example of the versatile control role a muscle  
202 can adopt. At steady state during running, it typically dissipates a small amount of energy during  
203 the swing period of each stride (Full et al., 1998). Its steady-state work is far below its capacity  
204 to either dissipate energy or do mechanical work when neural feedback modulates its function  
205 during locomotion (Sponberg, Spence, Mullens and Full, 2011). Neural feedback can also turn  
206 this muscle into a motor assisting in obstacle traversal or turning (Sponberg, Spence, Mullens and  
207 Full, 2011). Our results here indicate another control function: open-loop tuning of the limb's  
208 response to disturbances. Cockroaches locomote with stride frequencies that vary over a wide band  
209 (at least  $1 - 12Hz$ ); therefore the time available to stabilize perturbations decreases dramatically  
210 as running speed increases (Sponberg and Full, 2008). Even with constant timing of stimulation,  
211 muscle 137's dissipative capacity during leg swing increases almost 50% over this frequency range.  
212 Unlike impulsive behaviors that can do work over a relatively long time (Ilton et al., 2018), both  
213 muscle's dissipative power and total work matter for an effective response during perturbations.

|                                                                                                |                                  |
|------------------------------------------------------------------------------------------------|----------------------------------|
| Average reference stress (isometric, 20 ms after first spike)                                  | $17.3 \pm 5.8 \text{ Ncm}^{-2}$  |
| Average reference perturbation work                                                            | $-40.2 \pm 8.2 \mu\text{J}$      |
| Perturbation work at 10 Hz (eccentric history)                                                 | $-55.8 \pm 11.5 \mu\text{J}$     |
| Passive joint perturbation work                                                                | $-17.6 \pm 7.1 \mu\text{J}$      |
| Average specific dissipation power at 10 Hz                                                    | $-2360 \pm 798 \text{ Wkg}^{-1}$ |
| Muscle 137 <i>in situ</i> negative work Full et al. (1998)                                     | $-9 \mu\text{J}$                 |
| Muscle 137 <i>in situ</i> max positive work, 6 spikes Sponberg, Libby, Mullens and Full (2011) | $25 \mu\text{J}$                 |
| Muscle 137 <i>in situ</i> max negative work, 8 spikes Sponberg, Libby, Mullens and Full (2011) | $-45 \mu\text{J}$                |
| Muscle 177c <i>in situ</i> positive work Ahn and Full (2002)                                   | $74 \mu\text{J}$                 |
| Peak kinetic energy of all limbs, 20 cm/s running Kram et al. (1997)                           | $8 \mu\text{J}$                  |

Table 1: Selected statistics (means  $\pm$  95% CI) and comparison measures from earlier work. Reference stress/work was used to normalize stress/work across conditions in Fig. 2. Reference work was the average across pre-lengthened -shortened conditions at 1 Hz.

214 But with the capacity to dissipate  $2400 \text{ W/kg}$ , a muscle need not be large to absorb energy quickly.  
215 Rapid movements in animals at many scales challenge sensorimotor bandwidth (More and Donelan,  
216 2018). Context-dependent muscle behavior during perturbations could play an important role in  
217 stabilizing high-speed movements, especially if the animal can use anticipatory or feedforward  
218 control to tune muscle’s perturbation response.

219 Natural perturbations are unlikely to be prescribed kinematic deviations, although rigid ob-  
220 stacles such as on rough terrain could produce these. Exploring unsteady muscle function with  
221 perturbed work loops coupled to impulsive forces or simulated loads could lead to a more complete  
222 picture of perturbation responsiveness in specific muscles (Robertson and Sawicki, 2015). However,  
223 our approach of prescribed perturbations imposed at different frequencies isolated the effect of his-  
224 tory dependence and showed that stretch enhancement and shortening depression have significant  
225 consequences for muscle’s function during perturbations.

## 226 5 Acknowledgements

227 The authors would like to thank Tom Daniel and C. Dave Williams for helpful comments regarding  
228 this manuscript.

## 229 6 Competing interests

230 The authors have no competing interests.

## 231 7 Funding

232 This work was supported by Army Research Office grant W911NF-14-1-0396 and National Science  
233 Foundation CAREER (PoLS) 1554790 to S.S. as well as the National Science Foundation PoLS  
234 Student Research Network 1205878.

## 235 8 Data accessibility

236 Data used in this study will be made available through the online repository Dryad upon publica-  
237 tion.



## References

- Ahn, A. N. and Full, R. J. (2002), ‘A motor and a brake: two leg extensor muscles acting at the same joint manage energy differently in a running insect’, *Journal of Experimental Biology* **205**(3), 379–389.
- Ahn, A. N., Meijer, K. and Full, R. J. (2006), ‘In situ muscle power differs without varying in vitro mechanical properties in two insect leg muscles innervated by the same motor neuron’, *Journal of Experimental Biology* **209**(17), 3370–3382.
- Azizi, E. and Roberts, T. J. (2010), ‘Muscle performance during frog jumping: influence of elasticity on muscle operating lengths’, *Proceedings Of The Royal Society B-Biological Sciences* **277**(1687), 1523–1530.
- Bennet-Clark, H. (1975), ‘The energetics of the jump of the locust *Schistocerca gregaria*.’, *The Journal of experimental biology* **63**(1), 53–83.
- Biewener, A. A. and Daley, M. A. (2007), ‘Unsteady locomotion: integrating muscle function with whole body dynamics and neuromuscular control.’, *Journal of Experimental Biology* **210**(Pt 17), 2949–2960.
- Cannon, S. C. and Zahalak, G. I. (1982), ‘The Mechanical Behavior of Active Human Skeletal-Muscle in Small Oscillations’, *Journal of Biomechanics* **15**(2), 111–121.
- Dickinson, M. H., Farley, C. T., Full, R. J., Koehl, M. A., Kram, R. and Lehman, S. (2000), ‘How animals move: an integrative view.’, *Science* **288**(5463), 100–106.
- Full, R. J., Stokes, D. R., Ahn, A. N. and Josephson, R. K. (1998), ‘Energy absorption during running by leg muscles in a cockroach’, *Journal of Experimental Biology* **201** (Pt 7)(7), 997–1012.
- Herzog, W., Powers, K., Johnston, K. and Duvall, M. (2015), ‘A new paradigm for muscle contraction’, *Frontiers in Physiology* **6**, 174.
- Holt, N. C. and Williams, C. D. (2018), ‘Can Strain Dependent Inhibition of Cross-Bridge Binding Explain Shifts in Optimum Muscle Length?’, *Integrative and comparative biology* **58**(2), 174–185.
- Ilton, M., Bhamla, M. S., Ma, X., Cox, S. M., Fitchett, L. L., Kim, Y., Koh, J.-s., Krishnamurthy, D., Kuo, C.-Y., Temel, F. Z. et al. (2018), ‘The principles of cascading power limits in small, fast biological and engineered systems’, *Science* **360**(6387).
- Josephson, R. K. (1985), ‘Mechanical power output from striated-muscle during cyclic contraction’, *Journal of Experimental Biology* **114**(1), 493–512.
- Josephson, R. K. (1999), ‘Dissecting muscle power output’, *Journal of Experimental Biology* **202**(23), 3369–3375.
- Kirsch, R. F., Boskov, D. and Rymer, W. Z. (1994), ‘Muscle Stiffness During Transient and Continuous Movements of Cat Muscle: Perturbation Characteristics and Physiological Relevance’, *IEEE Transactions on Biomedical Engineering* **41**(8), 758–770.
- Kram, R., Wong, B. and Full, R. (1997), ‘Three-dimensional kinematics and limb kinetic energy of running cockroaches.’, *Journal of Experimental Biology* **200**(13), 1919–1929.
- Leonard, T. R., DuVall, M. and Herzog, W. (2010), ‘Force enhancement following stretch in a single sarcomere’, *AJP: Cell Physiology* **299**(6), C1398–C1401.

- Lindstedt, S. and Nishikawa, K. (2017), ‘Huxleys’ Missing Filament: Form and Function of Titin in Vertebrate Striated Muscle’, *Annual Review of Physiology* **79**(1), 145–166.
- More, H. L. and Donelan, J. M. (2018), ‘Scaling of sensorimotor delays in terrestrial mammals’, *Proceedings of the Royal Society B: Biological Sciences* **285**(1885), 20180613.
- Nishikawa, K. (2016), ‘Eccentric contraction: unraveling mechanisms of force enhancement and energy conservation’, *Journal of Experimental Biology* **219**(2), 189–196.
- Pipa, R. L. and Cook, E. F. (1959), ‘Studies on the hexapod nervous system. I. The peripheral distribution of the thoracic nerves of the adult cockroach, *Periplaneta americana*’, *Annals of the Entomological Society of America* **52**, 695–710.
- Rassier, D. E. (2012), ‘The mechanisms of the residual force enhancement after stretch of skeletal muscle: Non-uniformity in half-sarcomeres and stiffness of titin’, *Proceedings of the Royal Society B: Biological Sciences* **279**(1739), 2705–2713.
- Rassier, D. E. and Herzog, W. (2004), ‘Considerations on the history dependence of muscle contraction’, *Journal Of Applied Physiology* **96**(2), 419–427.
- Roberts, T. J. and Azizi, E. (2011), ‘Flexible mechanisms: the diverse roles of biological springs in vertebrate movement’, *Journal of Experimental Biology* **214**(3), 353–361.
- Robertson, B. D. and Sawicki, G. S. (2015), ‘Unconstrained muscle-tendon workloops indicate resonance tuning as a mechanism for elastic limb behavior during terrestrial locomotion.’, *Proceedings of the National Academy of Sciences* **112**(43), E5891–8.
- Sponberg, S. and Full, R. J. (2008), ‘Neuromechanical response of musculo-skeletal structures in cockroaches during rapid running on rough terrain.’, *Journal of Experimental Biology* **211**(Pt 3), 433–446.
- Sponberg, S., Libby, T., Mullens, C. H. and Full, R. J. (2011), ‘Shifts in a single muscle’s control potential of body dynamics are determined by mechanical feedback.’, *Philosophical Transactions Of The Royal Society Of London Series B-Biological Sciences* **366**(1570), 1606–1620.
- Sponberg, S., Spence, A. J., Mullens, C. H. and Full, R. J. (2011), ‘A single muscle’s multifunctional control potential of body dynamics for postural control and running.’, *Philosophical Transactions Of The Royal Society Of London Series B-Biological Sciences* **366**(1570), 1592–1605.
- Tanner, B. C. W., Daniel, T. L. and Regnier, M. (2012), ‘Filament Compliance Influences Cooperative Activation of Thin Filaments and the Dynamics of Force Production in Skeletal Muscle’, *PLoS Computational Biology* **8**(5).
- Zajac, F. E. (1989), ‘Muscle and tendon: properties, models, scaling, and application to biomechanics and motor control’, *Crit Rev Biomed Eng* **17**(4), 359–411.
